# Supplementary material
Source: PubMed Central journal article supplement (PMC5384417)
Supplement: koni-06-03-1291106-s001.pdf [file koni-06-03-1291106-s001.pdf]

## Supplemental Figures

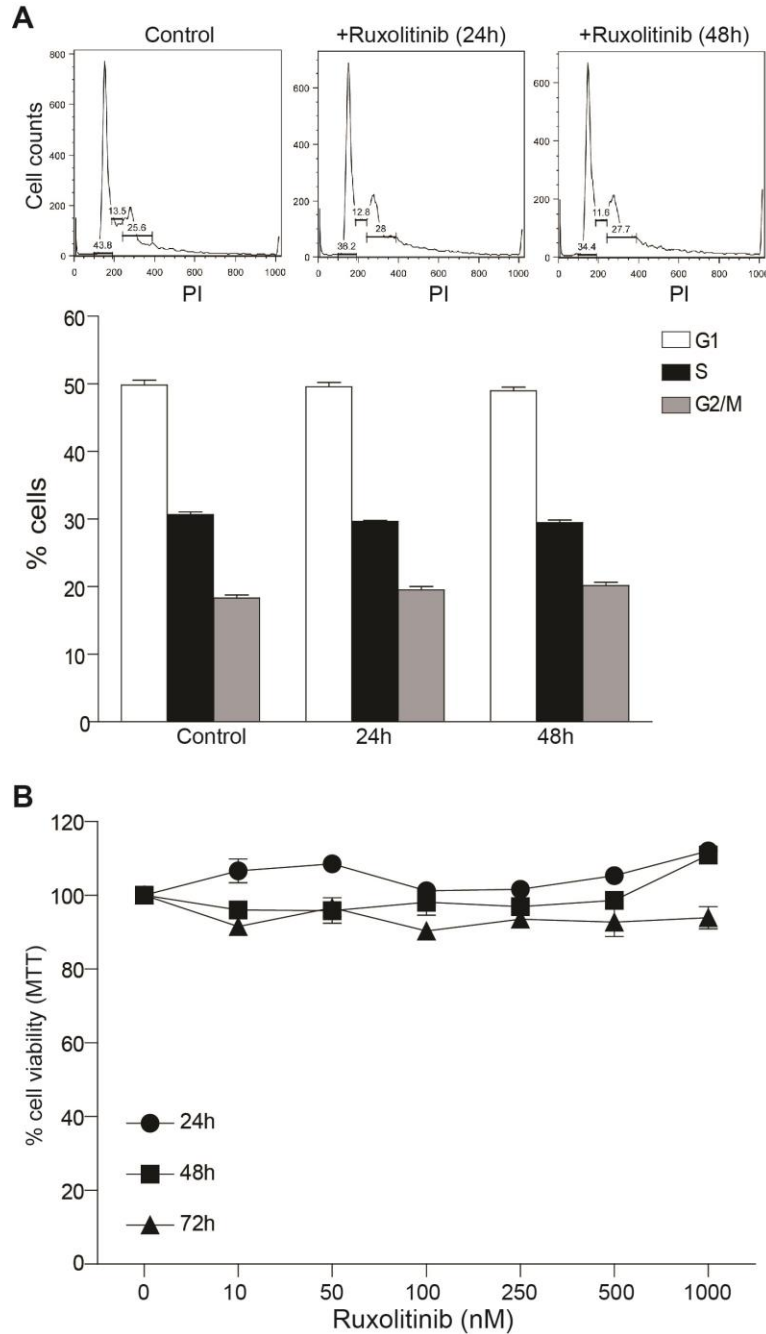

**Figure S1. Ruxolitinib treatment does not alter cell cycle and proliferation of tumor cells.** A. PANC02-H7 cells were cultured in the presence of ruxolitinib (250 nM). Cells were stained with PI and analyzed by flow cytometry at the indicated time points. The percentages of cells in the various cell cycle phases are indicated. Bottom panel: the percentage of cells in various stages of cell cycles as shown in the top panel is quantified. Column: mean; Bar: SD. B. PANC02-H7 cells were cultured in the presence of ruxolitinib at the indicated doses for the indicated time points and analyzed by MTT assays. The cell viability of untreated cells was set at 100%.

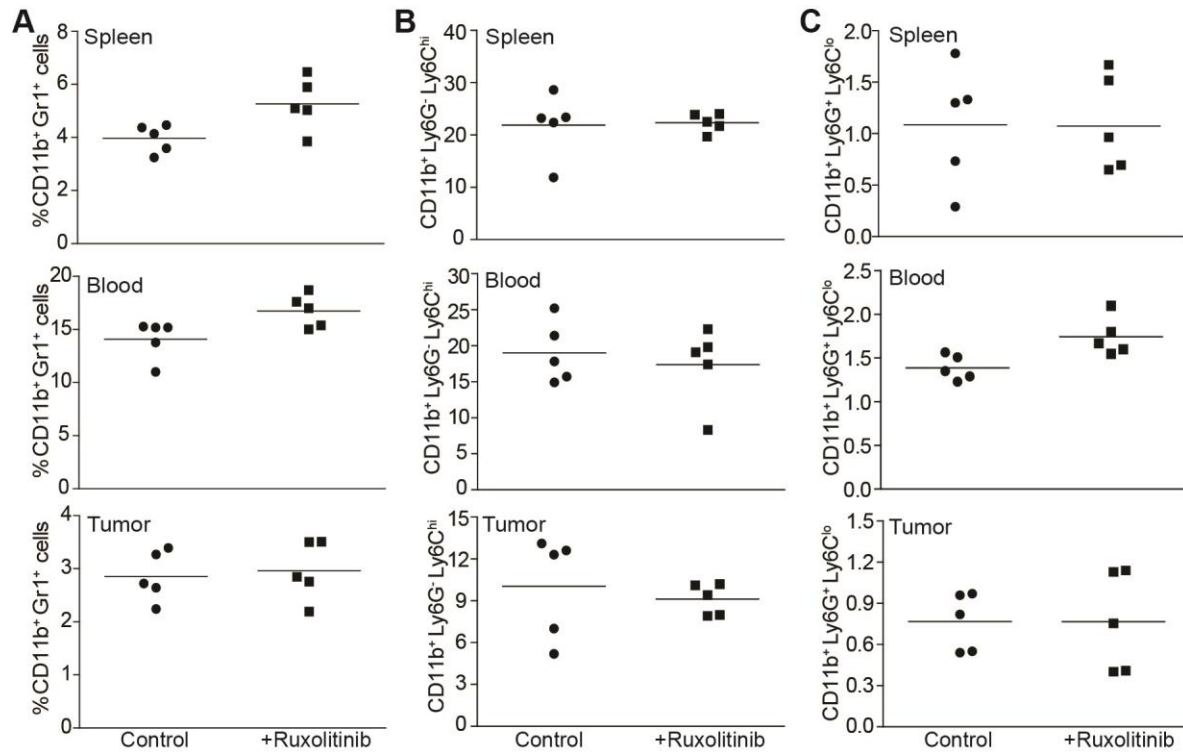

**Figure S2. MDSC level in tumor-bearing mice.** PANC02-H7 cells were orthotopically transplanted to mice. The tumor-bearing mice were treated daily with solvent (n=5) or ruxolitinib (n=5, 50 mg/kg body weight) for 10 days. Spleen, blood and tumors were collected to make single cells. The cell mixtures were stained with CD11b- and Gr1-specific mAbs (A), CD11b-Ly6G- and Ly6C-specific mAbs (B & C) and analyzed by flow cytometry. A: Quantification of CD11b<sup>+</sup>Gr1<sup>+</sup> general MDSCs. B: CD11b<sup>+</sup>Ly6G<sup>+</sup>Ly6C<sup>hi</sup> M-MDSCs. C: Quantification of CD11b<sup>+</sup>Ly6G<sup>+</sup>Ly6C<sup>lo</sup> PMN-MDSCs. Each dot represents % MDSCs of one mouse.

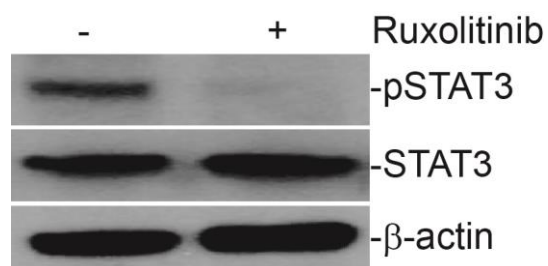

**Figure S3. Ruxolitinib inhibits STAT3 activation in tumor-infiltrating CTLs.** CD8<sup>+</sup> T cells were purified from tumor tissues from control (n=5) and Ruxolitinib-treated (n=5) mice. The purified cells from the five control and five Ruxolitinib-treated mice were pooled and lysed for total protein, and analyzed by Western blotting using the indicated antibodies. β-actin is used as normalization control.

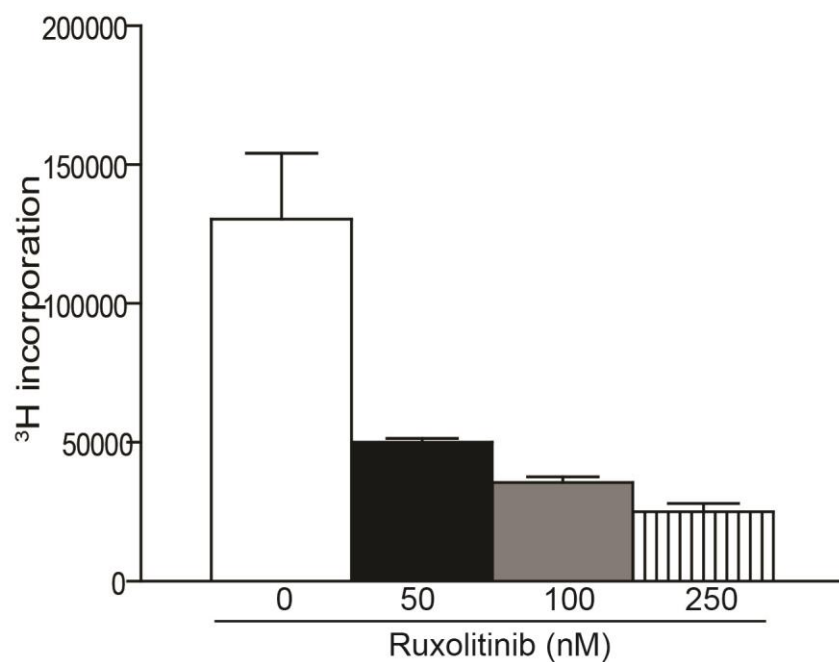

**Figure S4. Ruxolitinib inhibits T cell proliferation in vitro.** Purified CD3<sup>+</sup> T cells were cultured in anti-CD3/CD28-coated plates in the presence of ruxolitinib for 3 days. T cell proliferation was measured by <sup>3</sup>H-thymidine incorporation.

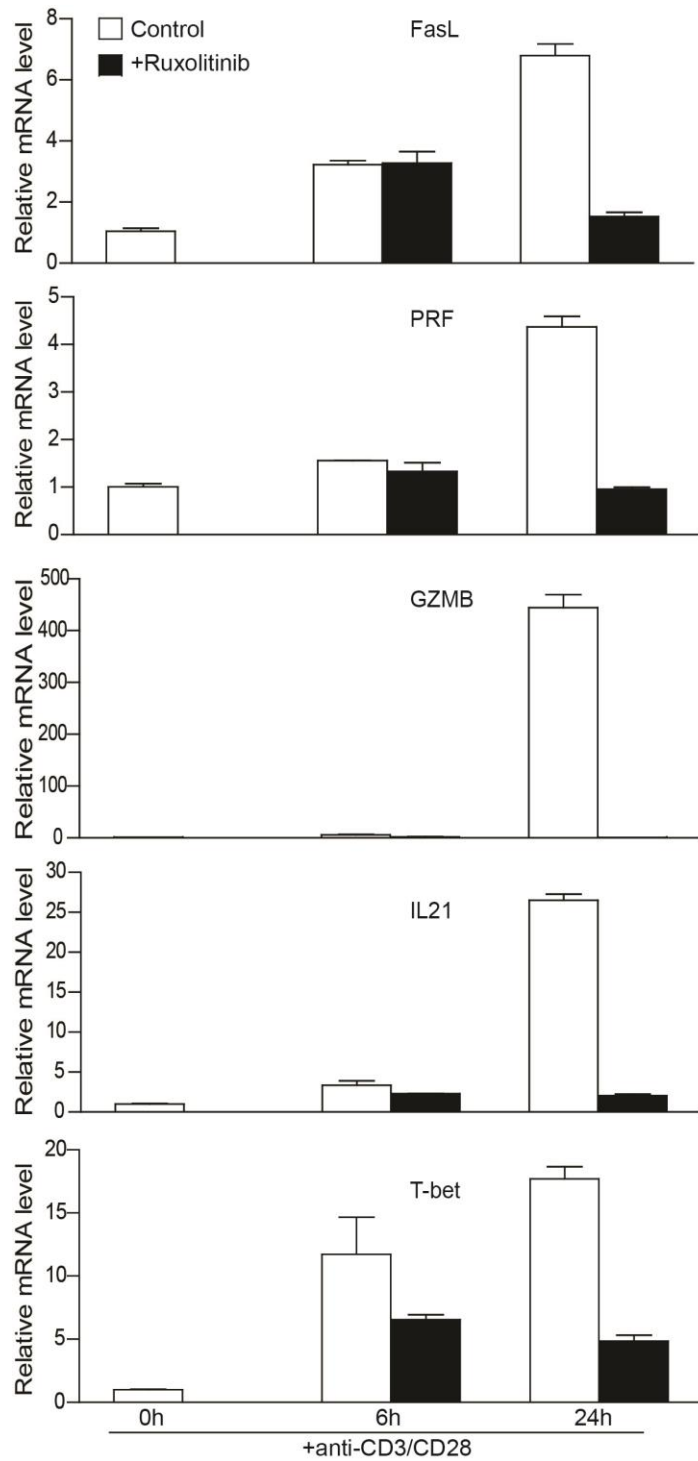

**Figure S5. Ruxolitinib inhibits T cell effector expression.** CD3<sup>+</sup> T cells were purified from spleen of C57BL/6 mice and cultured in anti-CD3/CD28-coated plates in the absence or presence of ruxolitinib. RNA was isolated at the indicated time points and analyzed for expression levels of the indicated genes by real-time PCR.

**Table S1. Reagents**

| Name                   | Company                    | Cat log#    | Application        |
|------------------------|----------------------------|-------------|--------------------|
| Pstat (Y701)           | BD transduction laboratory | 612133      | WB                 |
| STST1 (C-terminus)     | BD transduction laboratory | 51-90002093 | WB                 |
| pSTAT2 (Y690)          | Abcam                      | ab53132     | WB                 |
| STAT2 (H190)           | Santa cruz                 | sc22816     | WB                 |
| pSTAT3 (Y705)          | Upstate                    | 05-485      | WB                 |
| STAT3                  | BD transduction laboratory | 610190      | WB                 |
| pSTAT4 (Y693)          | Santa cruz                 | sc101804    | WB                 |
| STAT4 (H119)           | Santa cruz                 | sc7959      | WB                 |
| pSTAT5 (Y641)          | BD Bioscience Pharmigen    | 558242      | WB                 |
| STAT 5                 | BD transduction laboratory | 51-9002096  | WB                 |
| pSTAT6 (Y641)          | Santa cruz                 | sc11762     | WB                 |
| STAT6                  | BD transduction laboratory | 51-9002196  | WB                 |
| $\beta$ -actin         | Sigma                      | A5441       | WB                 |
| APC anti-mouse PD-L1   | Biolegend                  | 124312      | Flow               |
| FITC anti-mouse CD11b  | Biolegend                  | 101206      | Flow               |
| PE anti-mouse Gr1      | Biolegend                  | 108408      | Flow               |
| PE anti-mouse Ly6G     | BD Bioscience              | 551461      | Flow               |
| APC anti-mouse Ly6C    | Biolegend                  | 128016      | Flow               |
| APC anti-human PD-L1   | Biolegend                  | 329708      | Flow               |
| CD8                    | Dako                       | M103        | IHC                |
| PD-L1                  | Abcam                      | ab205921    | IHC                |
| Hamest anti-mouse CD3e | BD Pharmigen               | 553057      | Coating            |
| Hamest anti-mouse CD28 | BD Pharmigen               | 553294      | Coating            |
| Recombinant mouse IL21 | Biolegend                  | 574502      | Coating            |
| IgG                    | BioXCell                   | BP0091      | In-vivo treatment  |
| anti-IFN $\gamma$      | BioXCell                   | BP0055      | In-vivo treatment  |
| Fludarabine            | Santa cruz                 | sc204755    | In-vitro treatment |

**Table S2. PCR Primers**

|                    |                           |
|--------------------|---------------------------|
| mCTLA4-F           | CCCTGCTCACTCTTCTTTTCATCC  |
| mCTLA4-B           | TTTGGTCATTGTCTGCGCG       |
| mIL21-F            | AAGAGGCAAGGGTGTAGTAAGAAGC |
| mIL21-B            | GGAAAGGATGTGGGAGAGGAGAC   |
| mRORC-F            | AACTTGGGGAACCAGAACAGGG    |
| mRORC-B            | GCTTGGCAAACTCCACCACATAC   |
| mIL10-F            | GCTGGACAACATACTGCTAACCGAC |
| mIL10-B            | CTTGCTCTTATTTTCACAGGGGAG  |
| mTGF $\beta$ -F    | TTGAGTCCCTCGCATCCAG       |
| mTGF $\beta$ -B    | TCCCAAGGAAAGGTAGGTGATAGTC |
| mCD8-F             | ACCTGGACATCAGAGCCCCTTG    |
| mCD8-B             | AATCCTACGCTTTGCCACC       |
| mCD4-F             | CCTCAAGATAACCCAGGTCTCG    |
| mCD4-B             | CAAGGAAACCCAGAAAGCCG      |
| mIFN $\gamma$ -F   | CCATCAGCAACAACATAAGCGTC   |
| mIFN $\gamma$ -B   | TCTCTCCCCACCCGAATCAGCAG   |
| mPRF1-F            | CCTATGGCACGCACTTTATCACG   |
| mPRF1-B            | TTCACTGGAGACGCTGGCTTGG    |
| mGZMB-F            | GCCACAACATCAAAGAACAGG     |
| mGZMB-B            | CCAACCAGCCACATAGCACAC     |
| mIL17A-F           | CCCTCAGACTACCTCAACCGTTC   |
| mIL17A-B           | TCTCAGGCTCCCTCTTCAGGAC    |
| mIL6-F             | TCTGGGAAATCGTGGAAATGAG    |
| mIL6-B             | TCTCTGAAGGACTCTGGCTTTGTC  |
| mTbx21-F           | TGTTCCCATTCCTGTCTTCAC     |
| mTbx21-B           | TGCTGCCTTCTGCCTTTCC       |
| mIL23 $\alpha$ -F  | ATAATGTGCCCCGTATCCAGTG    |
| mIL23 $\alpha$ -B  | GCTCCCCTTTGAAGATGTCAGAG   |
| mPD-L1-F           | ATTGCTCCTTGACTGCTGGCTG    |
| mPD-L1-B           | TTCTGGGTTCTCCTCCTTTCC     |
| mPD-1-F            | CCGCCTTCTGTAATGGTTTGG     |
| mPD-1-B            | CGATTTTGCCTTGGGGTGC       |
| mFasL-F            | CTTGGGCTCCTCCAGGGTCAGT    |
| mFasL-B            | TCTCTCCATTAGCACCAGATCC    |
| mIL24-F            | AATGAATGCTGACTGAGCCTGCCC  |
| mIL24-B            | CCAAATCGGAACCTTGACCCTC    |
| mIL27-F            | TGCTTCCTCGCTACCACACTTC    |
| mIL27-B            | TCCTCTTCTCTTCTCCTCTGTCC   |
| mCSF1-F            | CAACACCCCAATGCTAACG       |
| mCSF1-B            | CCCTCTGTCTCTGAGAATCATCC   |
| mGM-CSF-F          | TCCTGGGCATTGTGGTCTACAG    |
| mGM-CSF-B          | TGGGGGGCAGTATGTCTGG       |
| mCXCL9-F1          | TCATTGCTACACTGAAGAACGGAG  |
| mCXCL9-B1          | ACGACGACGACTTGGGGTG       |
| mCXCL10-F1         | TCTCTCCATCACTCCCCTTTACC   |
| mCXCL10-B1         | CTTGCTTCGGCAGTTACTTTTGTC  |
| mIL9-F1            | GCTTGTGTCTCTCCGTCCCAAC    |
| mIL9-B1            | CACCCGATGGAAAACAGGC       |
| mGATA3-F1          | CCTCTACGCTCCTTGCTACTCAGG  |
| mGATA3-B1          | CCCCCCCCAAAAAAAAGC        |
| mIFN $\beta$ -F1   | CTGCGTTCCTGCTGTGCTTC      |
| mIFN $\beta$ -B1   | TCTTCTCCGTCATCTCCATAGGG   |
| mIFN $\alpha$ 1-F1 | CTGAAGGACAGGAAGGACTTTGG   |
| mIFN $\alpha$ 1-B1 | CTGCTGGTGGAGGTCATTGC      |
| m $\beta$ -Actin-F | CTGGCACACACCTTCTACAATG    |
| m $\beta$ -Actin-B | GGGTCATCTTTTACGGTTGG      |

Table S3. Pancreatic cancer patient information

| Patient* | Gender | Ethnicity | Age | Cancer Stage         | Primary or Metastatic  | Before or After Treatment                                                                                                          |
|----------|--------|-----------|-----|----------------------|------------------------|------------------------------------------------------------------------------------------------------------------------------------|
| 1        | Male   | Black     | 47  | pT3N1M0 ( Stage IIB) | Primary (G2 histology) | Patient with prior HNSCC treated with cisplatin and radiation. Last treatment 7 months prior to surgery to remove pancreatic tumor |
| 2        | Male   | Black     | 62  | pT3N1M0 (Stage IIB)  | Primary (G2 histology) | none                                                                                                                               |
| 3        | Female | White     | 53  | pT2N0M0 (Stage IB)   | Primary (G2 histology) | none                                                                                                                               |
| 4        | Male   | Black     | 67  | pT4N0M0 (Stage III)  | Primary (G2 histology) | none                                                                                                                               |
| 5        | Female | White     | 58  | pT3N0M0 (Stage IIA)  | Primary (G2 histology) | none                                                                                                                               |

\*Patient number as shown in Figure 7.
